# Supplementary material for: UGGT1 mediates N-glycosylation of LGALS3BP to induce angiogenesis in liver cancer via the NOTCH signaling pathway
Source: Research Square preprint supplement (doi:10.21203/rs.3.rs-8052281/v1), 2025-11-24
Supplement: Supplementary file 1 [file 353e3e9b79c5c39b40d9b3d6.docx]

**Table 1 Cell information**

| **Cell** | **Cat. No.** | **Manufacturer, Country** |
| --- | --- | --- |
| Human normal hepatocytes MIHA | TW34304 | Tongwei, China |
| Human HCC cell line Hep3B | CL-0102 | Procell, China |
| Human HCC cell line MHCC97L | C6586 | Beyotime, China |
| Human HCC cell line Huh7 | CL-0120 | Procell, China |
| Human embryonic kidney cell 293T | SCSP-502 | National Collection of Authenticated Cell Cultures, China |
| Human umbilical vein endothelial cells | CP-H082 | Procell, China |

**Table 2 Antibody information**

| **Antibody** | **Cat. No.** | **Manufacturer, Country** |
| --- | --- | --- |
| Rabbit anti-LGALS3BP | MA5-50412 | Invitrogen, USA |
| Rabbit anti-VEGF-A | ab214424 | Abcam, UK |
| Rabbit anti-NOTCH1 | ab52627 | Abcam, UK |
| Rabbit anti-N1ICD | 4147 | CST, USA |
| Rabbit anti-HES1 | [PU413471](http://www.ab-mart.com.cn/page.aspx?node=%2077%20&id=%20103197" \t "https://www.ab-mart.com.cn/_blank) | Abmart, China |
| Rabbit anti-UGGT1 | 14170-1-AP | Proteintech, China |
| Rabbit anti-β-actin | ab213262 | Abcam, UK |
| Goat anti-Rabbit IgG H&L(HRP) | ab205718 | Abcam, UK |

**Table 3 Primer sequences**

| **Primer** | **Forward (5’-3’)** | **Reverse (5’-3’)** |
| --- | --- | --- |
| LGALS3BP | CCTGTCGTCAGTCAAGTGCT | ATACAGGTCCAGGGGCATCT |
| NOTCH1 | GCAGAGGCGTGGCAGACTAT | TACTCCGTCAGCGTGAGCA |
| HES1 | ATGACAGTGAAGCACCTCCG | CGTTCATGCACTCGCTGAAG |
| HEY1 | TGAGAAGCAGGTAATGGAGCAA | ATAGTCCATAGCAAGGGCGTG |
| UGGT1 | CTGGGCAATTGCTTTGCGAG | GCCACAGTGCCAGAGACAA |
| β-actin | TTCACAATGTGGCCGAGGA | AGTGGGGTGGCTTTTAGGATG |
